# Supplementary material for: Association of Diet Quality With Longevity and Successful Aging in Israeli Adults 65 Years or Older
Source: PubMed Central journal article supplement (PMC9161011; doi:10.1001/jamanetworkopen.2022.14916), 2022-06-01
Supplement: jamanetwopen-e2214916-s001.pdf [file jamanetwopen-e2214916-s001.pdf]

## Supplementary Online Content

Goshen A, Golbourt U, Benyamini Y, Shimony T, Keinan-Boker L, Gerber Y. Association of diet quality with longevity and successful aging in Israeli adults 65 years or older. *JAMA Netw Open*. 2022;5(6):e2214916. doi:10.1001/jamanetworkopen.2022.14916

**eTable 1.** Prevalence of Each SA Domain Among T2 Participants

**eTable 2.** Mean HEI-2015 Score at Baseline According to Preserved/Not Preserved Status of Individual SA Components at Follow-up

**eTable 3.** Unweighted Odds Ratios (95% Confidence Intervals) of SA Across HEI-2015 Tertiles Among T2 Participants

**eTable 4.** Unweighted Odds Ratios (95% Confidence Intervals) of SA Across HEI-2015 Tertiles Among T2 Participants With No Functional or Cognitive Limitations at Baseline

**eTable 5.** Weighted Odds Ratios (95% Confidence Intervals) of Alternative SA Across HEI-2015 Tertiles Among T2 Participants

**eTable 6.** Weighted Odds Ratios (95% Confidence Intervals) of SA Across HEI-2015 Tertiles Among T2 Participants Applying a Different Adjustment Approach

**eFigure.** General Study Design

This supplementary material has been provided by the authors to give readers additional information about their work.

**eTable 1.** Prevalence of each SA domain among T2 participants (n=596).

| SA domain                    | n (%)    | Missing data, n (%) |
|------------------------------|----------|---------------------|
| Preserved physical function  | 516 (87) | 86 (14)*            |
| Preserved cognitive function | 479 (80) | 0 (0)               |
| Good self-reported health    | 390 (65) | 7 (1)               |
| Good mental health           | 486 (82) | 15 (2)**            |

Notes: MMSE= mini-mental state examination; SA= successful aging; n= number. Presented are prevalence of each successful aging domain among follow-up participants. \*At least one missing indicators of the frailty phenotype. \*\* Incomplete questionnaire of the Yesavage geriatric depression form.

**eTable 2.** Mean HEI-2015 score at baseline according to preserved/not preserved status of individual SA components at follow-up.

| SA component            | Mean HEI score (SD) |               | P-value |
|-------------------------|---------------------|---------------|---------|
|                         | Preserved           | Not preserved |         |
| Physical activity level | 61.73 (12.75)       | 60.95 (13.13) | .55     |
| Grip strength           | 62.25 (12.65)       | 58.85 (13.21) | .005    |
| Walking speed           | 61.51 (12.74)       | 61.79 (13.08) | .81     |
| Self-reported energy    | 61.15 (12.86)       | 61.75 (12.81) | .60     |
| Weight                  | 61.20 (12.87)       | 62.42 (12.69) | .29     |
| Cognitive function      | 62.08 (12.85)       | 59.68 (12.51) | .06     |
| Self-rated health       | 62.27 (12.93)       | 60.15 (12.50) | .05     |
| Mental health           | 62.28 (12.96)       | 58.91 (12.20) | .01     |

Notes: SA= successful aging; HEI= healthy eating index. Presented mean HEI-2015 score at baseline according to preserved/not preserved status of individual SA components at follow-up. Physical activity: score based on a Physical Activity Scale for the Elderly (PASE) questionnaire. Grip strength: an average of 2 measurement in Kg. Walking speed: time (sec) of a 5-meter walk. Self-reported energy: How much of the time during the past 4 weeks did you have a lot of energy? (All of the time-1, Most of the time-2, A good bit of the time-3, Some of the time-4, A little of the time-5, None of the time-6). Weight: Unintentionally weight loss of more than one kilogram in the past 6 months? (yes=1, no=0). Cognitive function: defined by change in MMSE scores between the two interviews. Self-rated health: “How would you rate your health status?” on a 4-point scale. Mental health: a 5-item short form of the Yesavage Geriatric Depression Scale (GDS).

**eTable 3.** Unweighted odds ratios (95% confidence intervals) of SA across HEI-2015 tertiles among T2 participants (n=596).

| <i>Adjustment</i> | <i>Healthy eating index score tertile</i> |                       |                       | <i>P for trend</i> |
|-------------------|-------------------------------------------|-----------------------|-----------------------|--------------------|
|                   | <i>1<sup>st</sup></i>                     | <i>2<sup>nd</sup></i> | <i>3<sup>rd</sup></i> |                    |
| Model 1           | 1                                         | 1.34 (0.88-2.06)      | 1.96 (1.29-2.99)      | .002               |
| Model 2           | 1                                         | 1.28 (0.83-1.98)      | 1.72 (1.10-2.68)      | .02                |

Notes: SA= successful aging; HEI= healthy eating index. Presented unweighted odds ratios of SA across HEI-2015 tertiles among T2 participants (n=596).

Model 1: Adjusted for age and sex. Model 2: Further adjusted for education, physical activity, and smoking.

**eTable 4.** Unweighted odds ratios (95% confidence intervals) of SA across HEI-2015 tertiles among T2 participants with no functional or cognitive limitations at baseline (n=452).

| <i>Adjustment</i> | <i>Healthy eating index score tertile</i> |                       |                       | <i>P for trend</i> |
|-------------------|-------------------------------------------|-----------------------|-----------------------|--------------------|
|                   | <i>1<sup>st</sup></i>                     | <i>2<sup>nd</sup></i> | <i>3<sup>rd</sup></i> |                    |
| Model 1           | 1                                         | 1.10 (0.67-1.81)      | 1.75 (1.08-2.84)      | .02                |
| Model 2           | 1                                         | 1.05 (0.63-1.76)      | 1.54 (0.93-2.57)      | .09                |

Notes: SA= successful aging; HEI= healthy eating index.\*According to cut point of ADL score  $\leq 6$  and MMSE score  $\geq 27$ . Presented unweighted odds ratios of SA according to tertiles of the HEI among T2 participants with no functional or cognitive limitations at baseline (n=452).

Model 1: Adjusted for age and sex. Model 2: Further adjusted for education, physical activity, and smoking.

**eTable 5.** Weighted odds ratios (95% confidence intervals) of alternative SA across HEI-2015 tertiles among T2 participants.

| <i>Adjustment</i> | <i>Healthy eating index score tertile</i> |                       |                       | <i>P for trend</i> |
|-------------------|-------------------------------------------|-----------------------|-----------------------|--------------------|
|                   | <i>1<sup>st</sup></i>                     | <i>2<sup>nd</sup></i> | <i>3<sup>rd</sup></i> |                    |
| Model 1           | 1                                         | 1.43 (0.91-2.24)      | 2.03 (1.30-3.17)      | .002               |
| Model 2           | 1                                         | 1.34 (0.84-2.12)      | 1.74 (1.09-2.77)      | .02                |

Notes: SA= successful aging; HEI= healthy eating index. Presented odds ratios of Alternative successful aging (n=390) according to tertiles of the HEI scores. Model 1: Adjusted for age and sex. Model 2: Further adjusted for education, physical activity, and smoking.

**eTable 6.** Weighted odds ratios (95% confidence intervals) of SA across HEI-2015 tertiles among T2 participants applying a different adjustment approach (n=596).

| <i>Adjustment</i> | <i>Healthy eating index score tertile</i> |                       |                       | <i>P for trend</i> |
|-------------------|-------------------------------------------|-----------------------|-----------------------|--------------------|
|                   | <i>1<sup>st</sup></i>                     | <i>2<sup>nd</sup></i> | <i>3<sup>rd</sup></i> |                    |
| Model 1           | 1                                         | 1.35 (0.88-2.07)      | 1.93 (1.25-2.98)      | .003               |
| Model 2           | 1                                         | 1.21 (0.77-1.90)      | 1.60 (1.01-2.52)      | .03                |

Notes: SA= successful aging; HEI= healthy eating index. Presented odds ratios of successful aging according to tertiles of the HEI scores. Model 1: Adjusted for age and sex. Model 2: Further adjusted for education, number of chronic diseases, physical activity, and BMI. Number of comorbid conditions were self-reported at study entry, and included the following: cardiovascular disease, cataract, chronic renal failure, cancer, Parkinson, lung disease, diabetes mellitus, osteoporosis, hyperlipidemia, and hypertension. Measured height and weight were used to calculate BMI (kg/m<sup>2</sup>).

**eFigure.** General study design

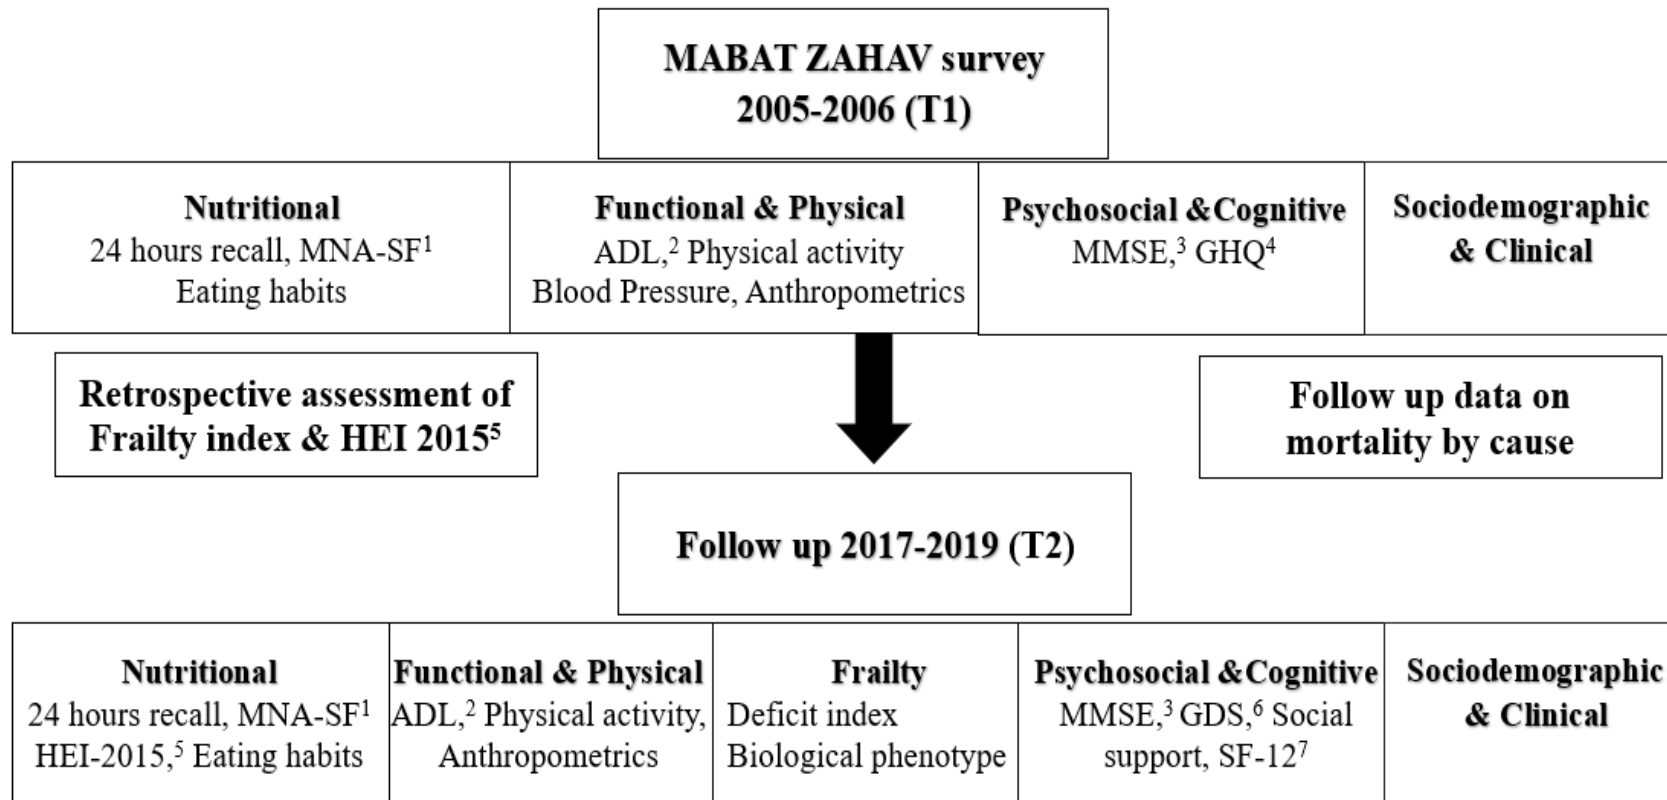

Notes: SA= successful aging; HEI= healthy eating index.<sup>1</sup>Mini Nutritional Assessment– Short Form; <sup>2</sup>Activities of Daily Living; <sup>3</sup>Mini Mental State Examination; <sup>4</sup> General Health Questionnaire; <sup>5</sup>Healthy Eating Index; <sup>6</sup>Geriatric Depression Scale; <sup>7</sup>Short Form of health-related-quality of life.
